# Supplementary material for: RB controls growth, survival, and neuronal migration in human cerebral organoids
Source: Oxford University Press journal article supplement (doi:10.1242/dev.143636), 2017-01-01
Supplement: dev143636supp.pdf [file dev143636supp.pdf]

**Table S1. Antibodies used for immunostaining and Western Blot**

| Antibody                 | Specie  | Manufacturer             | Catalog Number | Application    | Dilution |
|--------------------------|---------|--------------------------|----------------|----------------|----------|
| <b>Tuj1</b>              | Mouse   | Sigma                    | T8660          | Immunostaining | 1:400    |
|                          | Rabbit  | Biolegend                | PRB-435P       | Immunostaining | 1:250    |
| <b>GFAP</b>              | Rabbit  | DAKO                     | Z0334          | Immunostaining | 1:1000   |
| <b>RB</b>                | Mouse   | BD pharmingen            | 554136         | Immunostaining | 1:250    |
|                          | Mouse   | Santa Cruz               | sc-102         | Western blot   | 1:200    |
| <b>Dcx</b>               | Goat    | Santa Cruz               | sc-8066        | Immunostaining | 1:500    |
| <b>Cleaved Caspase 3</b> | Rabbit  | Cell Signaling           | D175           | Immunostaining | 1:400    |
| <b>Ki67</b>              | Rabbit  | Thermo Fisher Scientific | RM-9106S       | Immunostaining | 1:500    |
| <b>Sox2</b>              | Goat    | Santa Cruz               | Y17            | Immunostaining | 1:500    |
| <b>BrdU</b>              | Rat     | Accurate                 | OBT0030        | Immunostaining | 1:250    |
| <b>Pax6</b>              | Rabbit  | Biolegend                | 901301         | Immunostaining | 1:300    |
| <b>Vimentin</b>          | Chicken | Abcam                    | Ab24525        | Immunostaining | 1:500    |
| <b>GAPDH</b>             | Mouse   | Santa Cruz               | sc-32233       | Westernblot    | 1:1000   |
| <b>p107</b>              | Rabbit  | Santa Cruz               | sc-318         | Western blot   | 1:200    |
| <b>P130</b>              | Rabbit  | Santa Cruz               | sc-317         | Western blot   | 1:200    |

**Table S2. Secondary antibodies used for immunostaining and Western Blot**

| <b>Antibody</b>         | <b>Specie</b> | <b>Manufacturer</b>                       | <b>Catalog Number</b> | <b>Application</b> | <b>Dilution</b> |
|-------------------------|---------------|-------------------------------------------|-----------------------|--------------------|-----------------|
| <b>Anti-Chicken Cy3</b> | Donkey        | Jackson ImmunoResearch LABORATORIES, INC. | 703-165-155           | Immunostaining     | 1:250           |
| <b>Anti-Goat FITC</b>   | Donkey        | Jackson ImmunoResearch LABORATORIES, INC. | 705-095-147           | Immunostaining     | 1:250           |
| <b>Anti-Goat Cy3</b>    | Donkey        | Jackson ImmunoResearch LABORATORIES, INC. | 705-165-147           | Immunostaining     | 1:250           |
| <b>Anti-Goat Cy5</b>    | Donkey        | Jackson ImmunoResearch LABORATORIES, INC. | 705-175-147           | Immunostaining     | 1:250           |
| <b>Anti-Mouse FITC</b>  | Donkey        | Jackson ImmunoResearch LABORATORIES, INC. | 715-095-151           | Immunostaining     | 1:250           |
| <b>Anti-Mouse Cy3</b>   | Donkey        | Jackson ImmunoResearch LABORATORIES, INC. | 715-165-151           | Immunostaining     | 1.:250          |
| <b>Anti-Mouse Cy5</b>   | Donkey        | Jackson ImmunoResearch LABORATORIES, INC. | 715-175-151           | Immunostaining     | 1:250           |
| <b>Anti-Mouse HRP</b>   | Horse         | Cell Signaling                            | 7076S                 | Western Blot       | 1:10000         |
| <b>Anti-Rabbit FITC</b> | Donkey        | Jackson ImmunoResearch LABORATORIES, INC. | 711-095-152           | Immunostaining     | 1:250           |
| <b>Anti-Rabbit Cy3</b>  | Donkey        | Jackson ImmunoResearch LABORATORIES, INC. | 711-165-152           | Immunostaining     | 1:250           |
| <b>Anti-Rabbit Cy5</b>  | Donkey        | Jackson ImmunoResearch LABORATORIES, INC. | 711-175-152           | Immunostaining     | 1:250           |

**Table S3. Primers used for the gene profile analysis by RT-qPCR**

| Gene             | Primer (5'-3') |                               | Length (bp) |                                |
|------------------|----------------|-------------------------------|-------------|--------------------------------|
| <b>ApoER2</b>    | Forward        | CTGTGGCGACATTGATGAGTG         | 119         | (Wang and Seed, 2003)          |
|                  | Reverse        | TCTTGGTCAGTAGGTCCATCTC        |             |                                |
| <b>BAX</b>       | Forward        | CAGCTGACATGTTTTCTGACGGCA      | 118         | Designed by Lasergene software |
|                  | Reverse        | GTTCTGATCAGTTCCGGCACCTTG      |             |                                |
| <b>CASP3</b>     | Forward        | GTGGTACAGAACTGGACTGTGGCATTG   | 175         | Designed by Lasergene software |
|                  | Reverse        | ATGGCACAAAGCGACTGGATGAAC      |             |                                |
| <b>CASP8</b>     | Forward        | CCCTGCTGAGCACGTGGAGTTAG       | 158         | Designed by Lasergene software |
|                  | Reverse        | CCAGATCTTCACTGTCCAGTTGTTCC    |             |                                |
| <b>CYCLIN A2</b> | Forward        | CTAGCGCAGCAGCAGAGGC           | 91          | Designed by Lasergene software |
|                  | Reverse        | TCCAAGGAGGAACGGTGACAT         |             |                                |
| <b>CYCLIN E</b>  | Forward        | GCTCCCTGATCCCCACACCTG         | 232         | Designed by Lasergene software |
|                  | Reverse        | AGAAGAATTGCTCGCATTTTTGGCT     |             |                                |
| <b>E2F1</b>      | Forward        | CAAGAAGTCCAAGAACCACATCCAGT    | 117         | Designed by Lasergene software |
|                  | Reverse        | AGCTGCTGCTCGCTCTCCTG          |             |                                |
| <b>GAPDH</b>     | Forward        | GAAGGTGAAGGTCGGAGTC           | 226         | (Lei et al., 2009)             |
|                  | Reverse        | GAAGATGGTGATGGGATTTC          |             |                                |
| <b>p14</b>       | Forward        | GGTTTTCTGTTTCACATCCCG         | 107         | Designed by Lasergene software |
|                  | Reverse        | GCCCTAGACGCTGGCTCCTCA         |             |                                |
| <b>p21</b>       | Forward        | CAGGGGAGCAGGCTGAAGGGT         | 106         | Designed by Lasergene software |
|                  | Reverse        | ATCAGCCGGCGTTTGGAGTGG         |             |                                |
| <b>p53</b>       | Forward        | AGGCCCATCCTCACCATCATCAC       | 179         | Designed by Lasergene software |
|                  | Reverse        | AGTGCTCGCTTAGTGCTCCCTGG       |             |                                |
| <b>p107</b>      | Forward        | TCAAAATCCATATGAAGAACCACCAAAG  | 146         | Designed by Lasergene software |
|                  | Reverse        | CTAAGTCATCCCCAATCATCCGAAA     |             |                                |
| <b>p130</b>      | Forward        | CAGCAGCGAGGAAGGAAACAG         | 213         | Designed by Lasergene software |
|                  | Reverse        | AAAATTAGGGTTCACAAGTTCTTTACGAT |             |                                |
| <b>VLDLR</b>     | Forward        | CGAGACTGTCAAAGTACTGCAACTA     | 177         | (Ozcelik et al., 2008)         |
|                  | Reverse        | CACTAAGAGCAAGAGAGGAAGAATG     |             |                                |

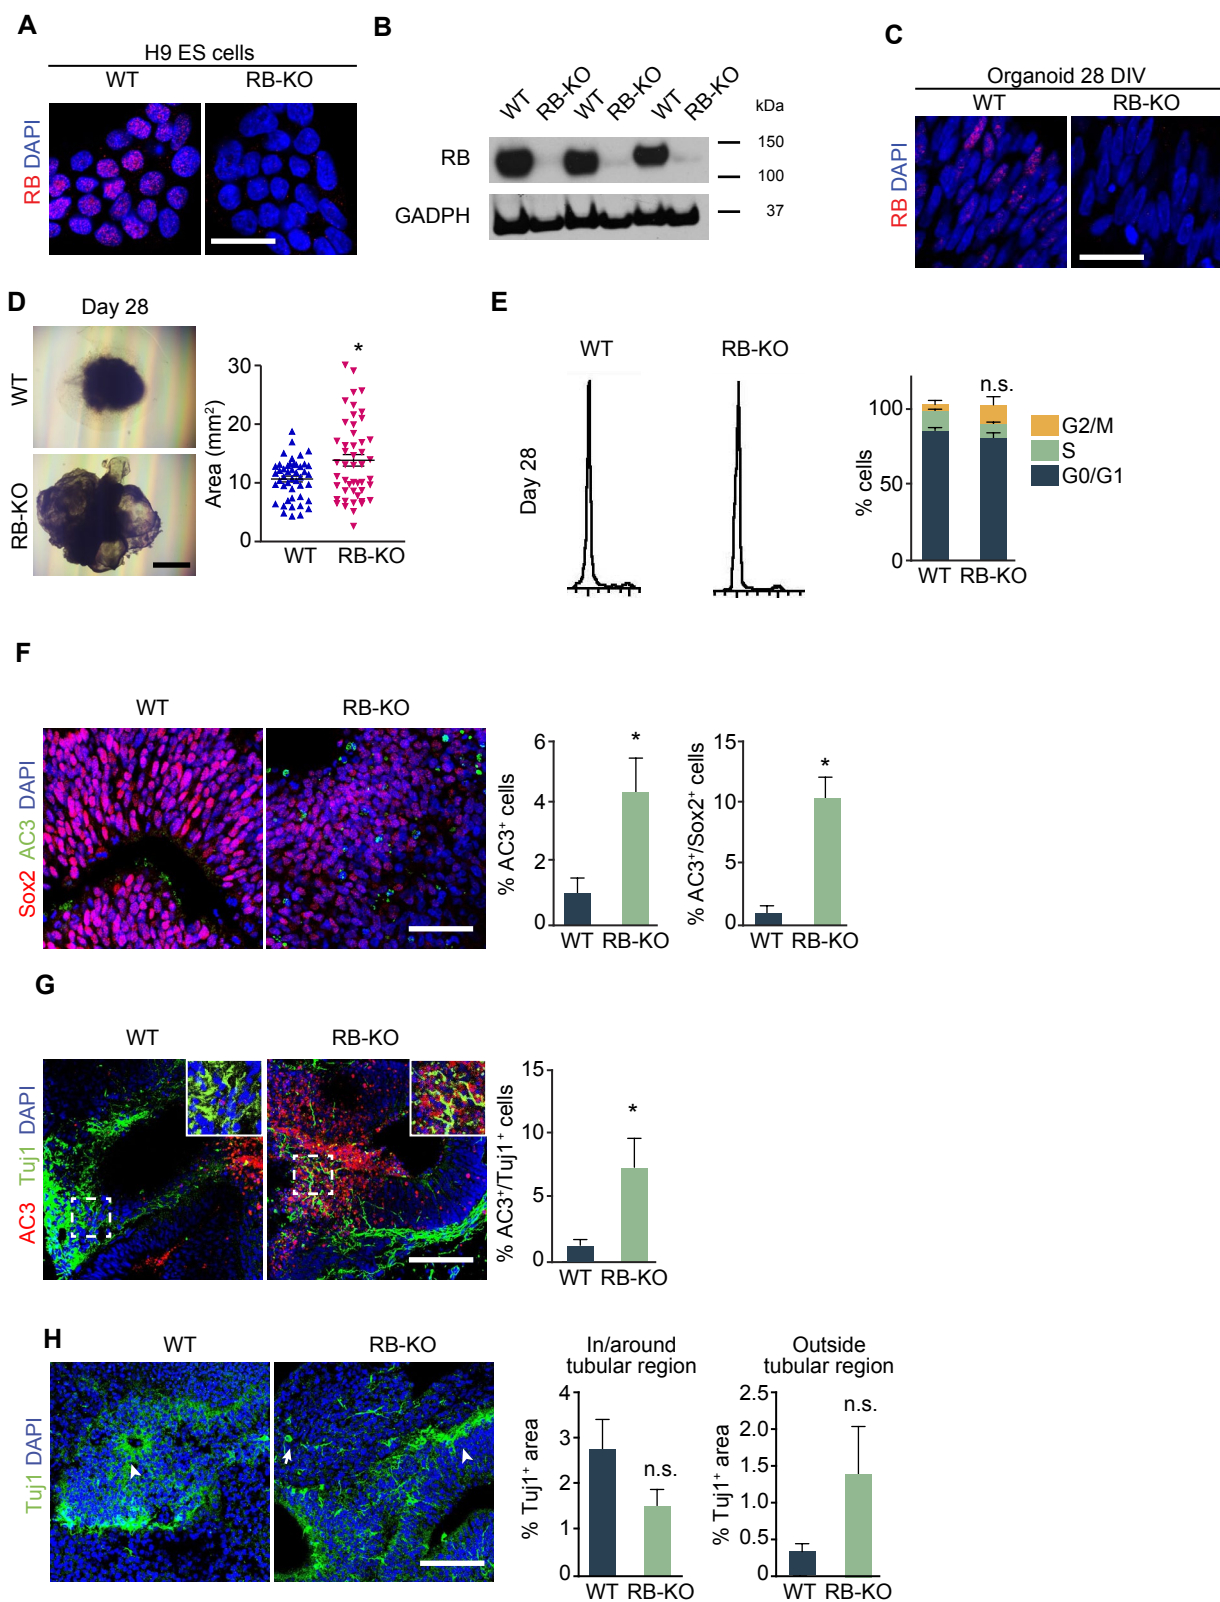

**Figure S1: The lack of RB increases the size and number of apoptotic cells in *RB*-KO cerebral organoids from a different clone of human ES cells.** We generated a second clone of *RB*-deficient H9 ESC line using CRISPR/Cas9. (A) The images show representative WT and KO-ESCs in culture immunostained against RB and counterstained with DAPI. (B) Western blot was performed to detect RB and GADPH proteins in samples from WT and *RB*-KO ESCs. (C) The images show representative WT and KO-organoids at 28 DIV sectioned and immunostained against RB and counterstained with DAPI. (D) The pictures show representative WT and KO organoids at 28 DIV. The graph shows the area mean of WT and KO organoids at 28 DIV. (E) The graphs show representative WT and KO-organoid cell cycle profiles at 28 DIV and the percentage of cells in each cell cycle phases. (F) The images show representative WT and KO-organoids at 28 DIV sectioned and immunostained against AC3/Sox2 and counterstained with DAPI. The graphs show the percentage of AC3<sup>+</sup> cells/DAPI and AC3<sup>+</sup> cells/Sox2<sup>+</sup> cells. (G) The images show representative WT and KO-organoids at 28 DIV sectioned and immunostained against AC3/Tuj1 and counterstained with DAPI. The graph shows the percentage of AC3<sup>+</sup> cells/Tuj1<sup>+</sup> cells. (H) The images show representative WT and KO-organoids at 28 DIV sectioned and immunostained against Tuj1 and counterstained with DAPI. Arrowheads in the WT and KO organoid show Tuj1<sup>+</sup> cells in/around tubular region. An arrow in the KO organoid shows ectopic Tuj1<sup>+</sup> cells outside the tubular region. The graphs show the percentage of Tuj1-stained area in/around and outside the tubular region. The results are the mean  $\pm$  SEM of 5-48 organoids from 3 independent experiments (\*  $P < 0.05$ , paired Student's t-test and n.s.=not significant). Scale bar: A-C, 25  $\mu$ m; F-G, 50  $\mu$ m; enlarged area, 25  $\mu$ m.

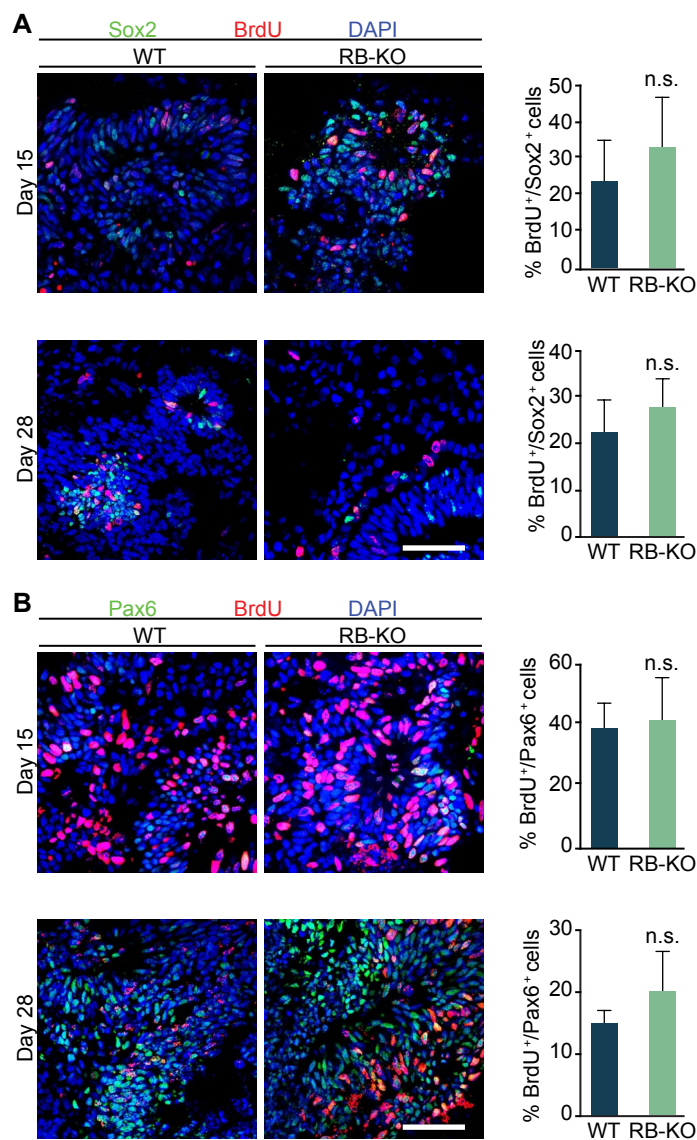

**Figure S2: The lack of RB did not affect the proliferation of NSC/progenitor cells in cerebral organoids at 28 DIV.** (A) The images show representative WT and KO-organoids at 15 and 28 DIV sectioned and immunostained against BrdU/Sox2 and counterstained with DAPI. The graphs show the percentage of BrdU<sup>+</sup> cells/Sox2<sup>+</sup> at both ages. (B) The images show representative WT and KO-organoids at 15 and 28 DIV sectioned and immunostained against BrdU/Pax6 and counterstained with DAPI. The graphs show the percentage of BrdU<sup>+</sup> cells/Pax6<sup>+</sup> at both ages. The results are the mean  $\pm$  SEM of 5-6 organoids from 3 independent experiments (n.s.=not significant). Scale bar: 50  $\mu$ m.



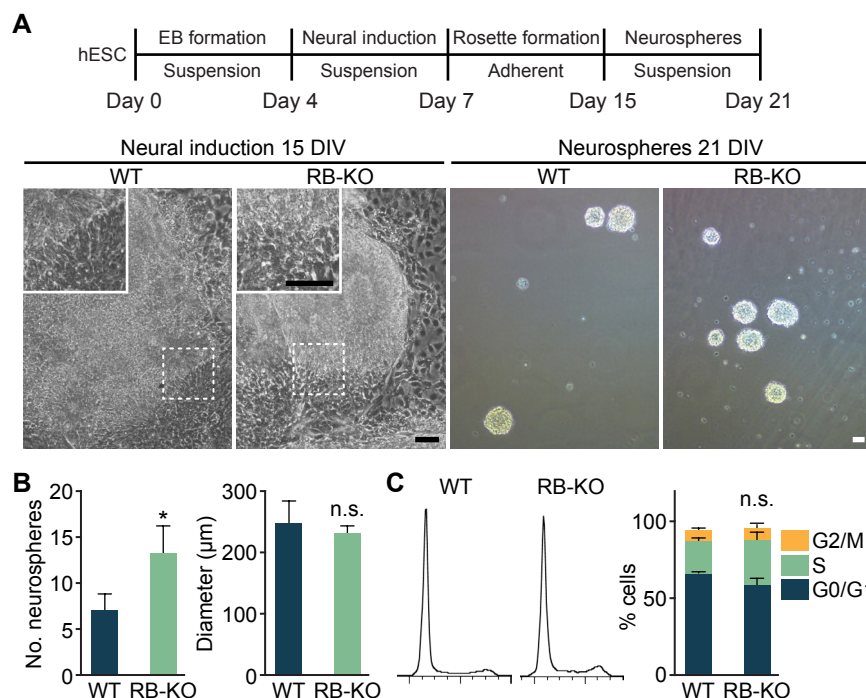

**Figure S3: RB deletion promotes the proliferation of neurospheres.** (A) Experimental scheme to obtain neurospheres from H9 ESCs at 21 DIV. The images show representative rosettes and neurospheres from WT and KO cultures at 15 and 21 DIV, respectively. Boxed insets in WT and KO cultures show rosette formation. (B) The graphs show the number of neurospheres and their diameter in WT and KO cultures. (C) The graphs on the left show representative WT and KO cell cycle profiles and the graph on the right shows the percentage of cells in each cell cycle phase. The results are the mean  $\pm$  SEM of neurospheres from 8 independent experiments (\*  $P < 0.05$ , paired Student's t-test and n.s.=not significant). Scale bar: 50  $\mu$ m.
